TITLE: THE CEREBRAL METABOLIC RATE FOR OXYGEN IS NOT DEPENDENT ON CEREBRAL OXYGEN DELIVERY IN CRITICALLY ILL PATIENTS

AUTHORS: N.H. Bertels, M.D., D.S. Prough, M.D., D.A. Stump, Ph.D., L. Hinshelwood, M.A.

AFFILIATION: Departments of Anesthesia and Neurology, Wake Forest University Medical Center, Winston-Salem, North Carolina 27103

**Introduction:** Normally, systemic oxygen consumption ( $\dot{V}O_2$ ) is not altered by changes in systemic oxygen ( $O_2$ ) delivery, except at very low levels of  $O_2$  delivery ( $\dot{D}O_2$ ). However, in ARDS, and below a critical threshold in anesthetized man,  $\dot{V}O_2$  does appear to be flow-limited. The relationship between regional  $O_2$  consumption and delivery has not been studied in critically ill patients. We performed studies of cerebral blood flow (CBF) and the cerebral metabolic rate for  $O_2$  ( $CMRO_2$ ) in six critically ill patients to determine whether systematic changes in cerebral oxygen delivery ( $\dot{C}DO_2$ ) would produce corresponding changes in  $CMRO_2$ .

**Methods:** After approval by the Clinical Research Practices Committee, written consent was obtained. CBF was determined by the clearance of intravenous  $^{133}\text{Xe}$  ( $^{133}\text{Xe}$ ) measured by 16 gamma detectors. End-tidal  $^{133}\text{Xe}$  concentration was measured to correct for recirculation. CBF was calculated by the  $\text{CBF}_{15}$  technique, corrected for temperature and hematocrit. Mean global CBF was determined by averaging CBF from all detectors. In each patient a right jugular bulb catheter was placed. An initial measurement of CBF was then made. After this, CBF was increased or decreased so that  $CMRO_2$  was calculated for each patient at a lower and higher  $\dot{C}DO_2$  ( $\text{CBF } \text{CaO}_2$ ). CBF was altered by increasing or decreasing  $\text{PaCO}_2$  by changing mechanical ventilatory rate so as to result in the safest change in systemic pH. CBF measurement was repeated 30 minutes after changing the ventilatory rate. One minute after injection of  $^{133}\text{Xe}$ , systemic blood pressure was recorded, and samples were drawn for measurement of arterial and jugular venous partial pressures of  $O_2$  and carbon dioxide,  $O_2$  saturation ( $\text{SaO}_2$ ,  $\text{SjvO}_2$ ), and hemoglobin (Hb). From these data were calculated arterial and jugular venous  $O_2$  contents ( $\text{CaO}_2$ ,  $\text{CjvO}_2$ ), arterio-venous  $O_2$  content difference ( $\text{Ca-jvDO}_2$ ),  $CMRO_2$  ( $\text{CBF } \text{Ca-jvDO}_2$ ), and  $\dot{C}DO_2$ . Mean  $CMRO_2$  and  $\dot{C}DO_2$  data were compared using paired two-tailed  $t$  tests, significant at  $p < 0.05$ .

**Results:** At a mean lower  $\dot{C}DO_2$  of  $3.8 \pm 1.8$  (SD)  $\text{ml}/100\text{g}/\text{min}$ ,  $CMRO_2$  was  $1.2 \pm 0.6$   $\text{ml}/100\text{g}/\text{min}$ . At a mean higher  $\dot{C}DO_2$  of  $5.1 \pm 2.5$   $\text{ml}/100\text{g}/\text{min}$ ,  $CMRO_2$  was  $1.4 \pm 0.9$   $\text{ml}/100\text{g}/\text{min}$ . While the difference in  $\dot{C}DO_2$  was significant, the difference in  $CMRO_2$  was not. Mean arterial pressure,  $\text{SaO}_2$ , hemoglobin, and temperature were not significantly different between data points. Before  $\dot{C}DO_2$  was experimentally altered,  $\dot{C}DO_2$  averaged  $4.4 \pm 1.9$   $\text{ml}/100\text{g}/\text{min}$ , and  $CMRO_2$  averaged  $1.3 \pm 0.5$   $\text{ml}/100\text{g}/\text{min}$  (normal:  $\dot{C}DO_2 = 7 \pm 10$   $\text{ml}/100\text{g}/\text{min}$ ;  $CMRO_2 = 3-3.5$   $\text{ml}/100\text{g}/\text{min}$ ). The figure shows data for six subjects, two of whom were studied on two different days. Patients 1, 2, and 3 were septic, and patients 4, 5, and 6 had closed head injuries without intracranial hypertension. Triangles indicate  $\dot{C}DO_2$  and

$CMRO_2$  obtained before alteration of  $\dot{C}DO_2$ . Circles indicate  $\dot{C}DO_2$  and  $CMRO_2$  obtained after alteration of  $\dot{C}DO_2$ .

**Discussion:**  $O_2$  consumption is not normally limited by  $O_2$  delivery, except at very low levels of  $O_2$  delivery. Changes in  $O_2$  consumption, systemic or cerebral, are primary determinants of systemic or cerebral blood flow. In some critically ill patients this relationship is abnormal, and oxygen delivery becomes a primary determinant of oxygen consumption. In this series of critically ill patients, changes in  $\dot{C}DO_2$  did not change  $CMRO_2$ . Before experimental alteration of  $\dot{C}DO_2$ , both  $\dot{C}DO_2$  and  $CMRO_2$  were approximately half normal. The failure of  $CMRO_2$  to change in response to alteration of  $\dot{C}DO_2$  suggests that reduced utilization was not due to a primary CBF reduction. Efforts to improve  $CMRO_2$ , and inferentially neurologic outcome, by increasing  $\dot{C}DO_2$  may be ineffective in some critically ill patients. However, in two of the head-injured patients, an increase in  $\dot{C}DO_2$  increased  $CMRO_2$ . In such cases an increase in CBF could be beneficial, or hyperventilation could further impair  $O_2$  utilization. More studies are needed to define subsets of patients in which an increase in  $\dot{C}DO_2$  produces an increase in  $CMRO_2$ . It is also necessary to determine the most effective means of increasing  $\dot{C}DO_2$ , and to determine whether this improves neurological outcome.

#### References:

1. Danek SJ, Lynch JP, Weg JG, Dantzker DR: The dependence of oxygen uptake on oxygen delivery in the adult respiratory distress syndrome. *Am Rev Resp Dis* 122:387-395, 1980
2. Shibutani K, Komatsu T, Kubal K, Sanchala V, et al: Critical level of oxygen delivery in anesthetized man. *Crit Care Med* 11:640-643, 1983

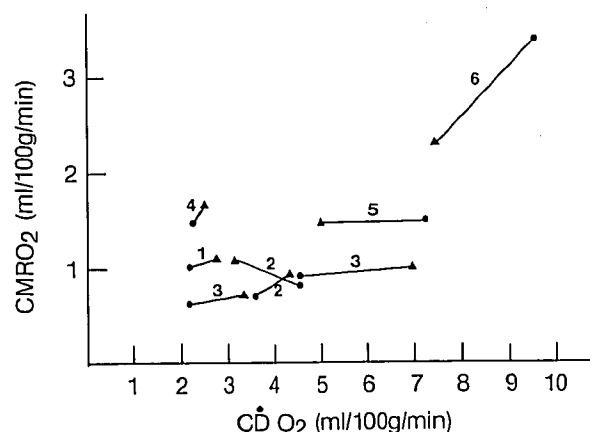

Source: https://asa2.silverchair.com/anesthesiology/article-pdf/67/3/A121/634726/0000542-198709001-00121.pdf
